# Supplementary material
Source: PubMed Central journal article supplement (PMC2675564)
Supplement: supp_179_9_772__1.pdf [file supp_179_9_772__1.pdf]

**Resolution of allergic inflammation and AHR is  
dependent upon disruption of the T1/ST2-IL-33 pathway**

Jennifer Kearley\*, Karen F Buckland\* Sara A Mathie and Clare M. Lloyd

**Online Data Supplement**

### **Online data supplement Figure E1**

Cells contained within a low FSC/SSC lymphocyte gate were plotted on a dot plot of FL-1 ( FITC T1/ST2) versus FL-2 (PE CD4) and double positive cells gated as shown. The total number of double positive cells in the BAL or lung tissue was calculated as shown.

### **Online data supplement Table E1**

Cells were quantified by differential counting of stained cytopins and data is plotted as mean  $\pm$  s.e.m; n = 4-9 mice per group.

Supplementary Figure E1

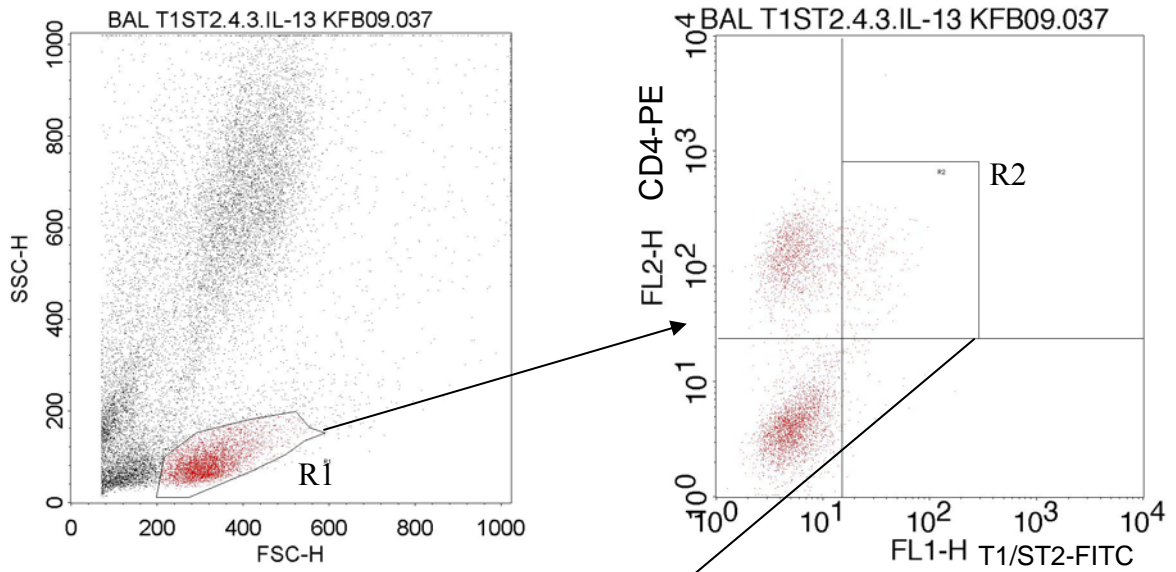

| Region | Events | % Gated | % Total |
|--------|--------|---------|---------|
| R1     | 4532   | 100.00  | 23.81   |
| R2     | 218    | 4.81    | 1.15    |

BAL calculation:

$$\text{Total BAL cells (cells/ml)} \times \frac{\text{R2 (\% of total cells)}}{100} \times \text{BAL volume (ml)} = \text{CD4+T1ST2+ (cells/ml)}$$

Lung calculation:

$$\text{Total lung cells (cells/mg)} \times \frac{\text{R2 (\% of total cells)}}{100} = \text{CD4+T1ST2+ (cells/mg)}$$

**A. BAL****Supplementary table E1**

| Group                        | Total cells<br>(x10 <sup>5</sup> /ml) | Macrophages<br>(x10 <sup>5</sup> /ml) | Eosinophils<br>(x10 <sup>5</sup> /ml) | Neutrophils<br>(x10 <sup>5</sup> /ml) | Lymphocyte/<br>Mononuclear cells<br>(x10 <sup>5</sup> /ml) |
|------------------------------|---------------------------------------|---------------------------------------|---------------------------------------|---------------------------------------|------------------------------------------------------------|
| BALB/c alum                  | 3.2±0.4                               | 3.0±0.6                               | 0±0                                   | 0±0                                   | 0.2±0.1                                                    |
| BALB/c OVA 24 hrs            | 25.9±2.6                              | 6.1±1.1                               | 15.9±1.8                              | 0.1±0.0                               | 5.5±0.9                                                    |
| BALB/c OVA 7 days            | 11.4±1.2                              | 5.0±0.8                               | 1.3±0.5                               | 0.0±0.0                               | 3.8±0.5                                                    |
| C57BL/6 alum                 | 1.7±0.2                               | 1.7±0.2                               | 0.0±0.1                               | 0.0±0.1                               | 0.0±0.1                                                    |
| C57BL/6 OVA 24 hrs           | 44.3±4.4                              | 7.7±2.2                               | 29.4±3.7                              | 0.2±0.1                               | 7.9±1.4                                                    |
| C57BL/6 OVA 7 days           | 6.34±0.8                              | 3.8±0.6                               | 0.6±0.3                               | 0.0±0.0                               | 1.9±0.3                                                    |
| BALB/c alum 7 days + Ig      | 2.5±0.7                               | 2.5±0.6                               | 0.0±0.1                               | 0.0±0.1                               | 0.0±0.1                                                    |
| BALB/c OVA 7 days + Ig       | 12.0±1.7                              | 5.6±1.8                               | 2.9±1.2                               | 0.0±0.1                               | 3.6±1.2                                                    |
| BALB/c alum 7 days + αT1/ST2 | 2.7±0.6                               | 2.6±0.6                               | 0.0±0.1                               | 0.0±0.1                               | 0.0±0.1                                                    |
| BALB/c OVA 7 days + αT1/ST2  | 8.2±0.9                               | 4.0±0.4                               | 2.0±0.2                               | 0.0±0.1                               | 2.1±0.3                                                    |

**B. Lung tissue**

| Group                        | Total cells<br>(x10 <sup>3</sup> /mg) | Macrophages<br>(x10 <sup>3</sup> /mg) | Eosinophils<br>(x10 <sup>3</sup> /mg) | Neutrophils<br>(x10 <sup>3</sup> /mg) | Lymphocyte/<br>Mononuclear cells<br>(x10 <sup>3</sup> /mg) |
|------------------------------|---------------------------------------|---------------------------------------|---------------------------------------|---------------------------------------|------------------------------------------------------------|
| BALB/c alum                  | 13.1±2.8                              | 7.9±0.9                               | 0.5±0.1                               | 0.2±0.1                               | 4.7±0.8                                                    |
| BALB/c OVA 24 hrs            | 49.7±4.0                              | 12.2±1.2                              | 24.1±1.6                              | 0.4±0.1                               | 14.6±1.3                                                   |
| BALB/c OVA 7 days            | 20.3±1.9                              | 8.4±1.2                               | 2.2±0.5                               | 0.5±0.1                               | 12.5±1.7                                                   |
| C57BL/6 alum                 | 12.4±1.8                              | 7.2±1.0                               | 0.2±0.1                               | 0.0±0.1                               | 5.2±0.8                                                    |
| C57BL/6 OVA 24 hrs           | 46.6±7.9                              | 12.1±2.1                              | 17.1±2.3                              | 0.6±0.1                               | 17.3±1.7                                                   |
| C57BL/6 OVA 7 days           | 14.8±2.4                              | 6.3±0.9                               | 1.1±0.2                               | 0.5±0.1                               | 7.1±1.4                                                    |
| BALB/c alum 7 days + Ig      | 4.0±0.8                               | 0.9±0.4                               | 1.6±0.5                               | 0.2±0.1                               | 1.4±0.2                                                    |
| BALB/c OVA 7 days + Ig       | 5.0±1.8                               | 0.7±0.3                               | 2.6±1.2                               | 0.3±0.1                               | 1.5±0.5                                                    |
| BALB/c alum 7 days + αT1/ST2 | 17.5±3.7                              | 3.8±1.1                               | 8.2±1.8                               | 0.6±0.5                               | 4.9±1.2                                                    |
| BALB/c OVA 7 days + αT1/ST2  | 17.8±7.1                              | 4.9±2.0                               | 6.7±2.7                               | 1.2±1.1                               | 5.0±1.9                                                    |
